# Supplementary material
Source: publisher figshare collection journal article supplement (https://frontiersin.figshare.com/ndownloader/files/12299795)
Supplement: Supplementary file [file 12299795]

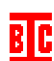

Brookhaven Instruments Corp.  
ZetaPals Particle Sizing Software Ver. 3.86

Date: Aug 4, 2017

Time: 12:16:56

Batch: 0

Sample ID **AgNPs-3W-cost-01-08-17-centr- (Combined)**

Operator ID **Luca**

Notes **04-08-2017**

Measurement Parameters:

Temperature = 25.0 deg. C  
Liquid = Water  
Viscosity = 0.890 cP  
Ref.Index Fluid = 1.330  
Angle = 90.00  
Wavelength = 660.0 nm  
Baseline = Auto (Slope Analysis)

Runs Completed = 5  
Run Duration = 00:01:00  
Total Elapsed Time = 00:05:00  
Average Count Rate = 274.3 kcps  
Ref.Index Real = 1.000  
Ref.Index Imag = 0.000  
Dust Filter = Off

AgNPs-3W-cost-01-08-17-centr- (Combined)

**Effective Diameter: 30.1 nm**

**Polydispersity: 0.139**

**Baseline Index: 7.9**

**Elapsed Time: 00:05:00**

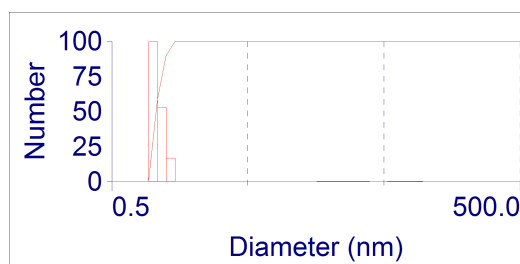

Multimodal Size Distribution

| Run        | Eff. Diam. (nm) | Half Width (nm) | Polydispersity | Baseline Index |
|------------|-----------------|-----------------|----------------|----------------|
| 1          | 29.1            | 11.1            | 0.145          | 7.5            |
| 2          | 30.0            | 9.7             | 0.105          | 7.1            |
| 3          | 29.9            | 12.3            | 0.168          | 9.0            |
| 4          | 30.6            | 11.5            | 0.140          | 7.8            |
| 5          | 30.9            | 12.0            | 0.150          | 8.3            |
| Mean       | 30.1            | 11.3            | 0.142          | 7.9            |
| Std. Error | 0.3             | 0.4             | 0.010          | 0.3            |
| Combined   | 30.1            | 11.2            | 0.139          | 7.9            |

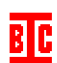

Brookhaven Instruments Corp.  
ZetaPals Particle Sizing Software Ver. 3.86

Date: Aug 4, 2017

Time: 12:16:56

Batch: 0

Sample ID **AgNPs-3W-cost-01-08-17-centr- (Combined)**

Operator ID **Luca**

Notes **04-08-2017**

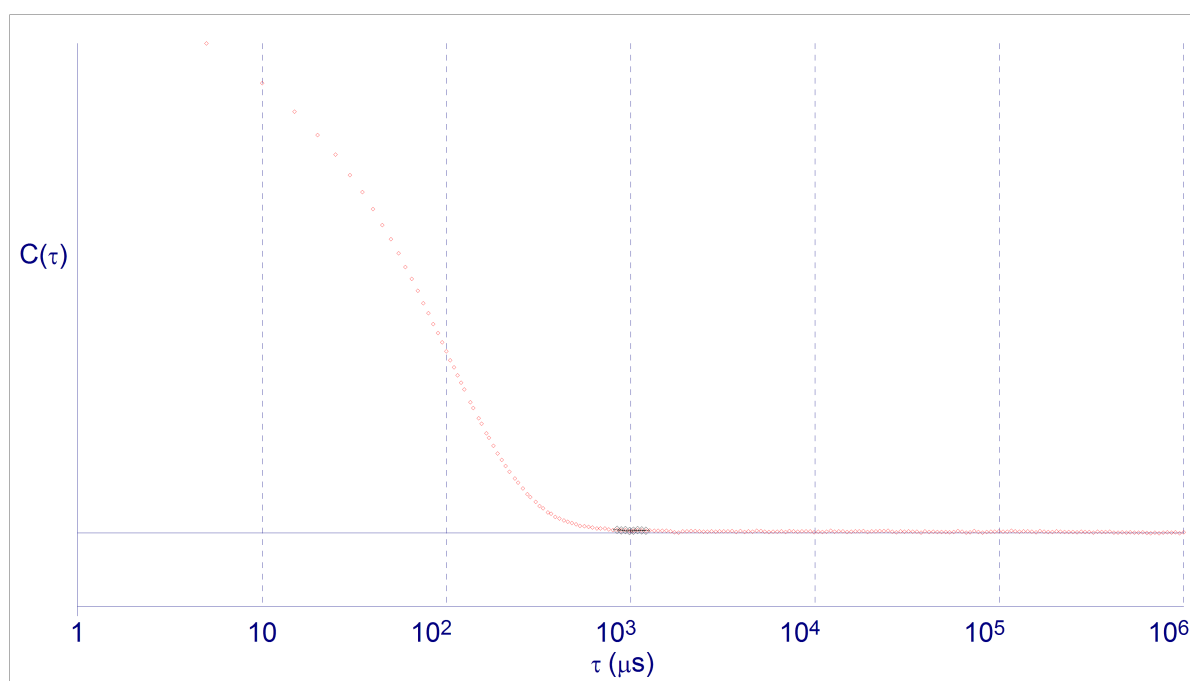

Correlation Function



Brookhaven Instruments Corp.  
ZetaPals Particle Sizing Software Ver. 3.86

Date: Aug 4, 2017

Time: 12:16:56

Batch: 0

Sample ID **AgNPs-3W-cost-01-08-17-centr- (Combined)**

Operator ID **Luca**

Notes **04-08-2017**

Elapsed Time 00:05:00  
Eff. Diam. 30.1 nm  
Mean Diam. 32.1 nm  
Polydispersity 0.139  
GSD 1.435

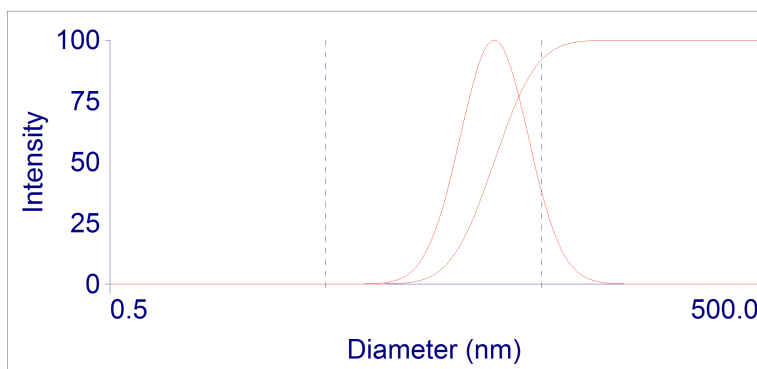

Lognormal Size Distribution

| r(nm) | G(r) | C(r) | d(nm) | G(d) | C(d) | d(nm) | G(d) | C(d) |
|-------|------|------|-------|------|------|-------|------|------|
| 16.6  | 26   | 5    | 27.5  | 97   | 40   | 38.4  | 80   | 75   |
| 18.9  | 44   | 10   | 28.8  | 99   | 45   | 40.8  | 70   | 80   |
| 20.7  | 58   | 15   | 30.1  | 100  | 50   | 43.8  | 58   | 85   |
| 22.2  | 70   | 20   | 31.5  | 99   | 55   | 47.8  | 44   | 90   |
| 23.6  | 80   | 25   | 33.0  | 97   | 60   | 54.6  | 26   | 95   |
| 24.9  | 87   | 30   | 34.6  | 93   | 65   |       |      |      |
| 26.2  | 93   | 35   | 36.4  | 87   | 70   |       |      |      |



Brookhaven Instruments Corp.  
ZetaPals Particle Sizing Software Ver. 3.86

Date: Aug 4, 2017

Time: 12:16:56

Batch: 0

Sample ID **AgNPs-3W-cost-01-08-17-centr- (Combined)**

Operator ID **Luca**

Notes **04-08-2017**

Elapsed Time 00:05:00  
Mean Diam. 1.1 nm  
Rel. Var. 0.011  
Skew 2.134

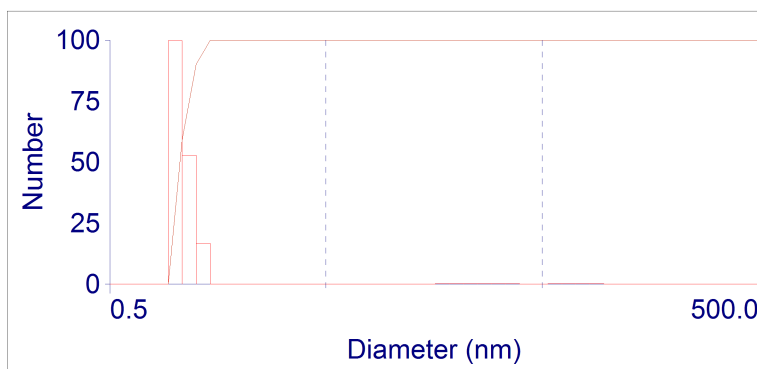

Multimodal Size Distribution

| d(nm) | G(d) | C(d) | d(nm) | G(d) | C(d) | d(nm) | G(d) | C(d) |
|-------|------|------|-------|------|------|-------|------|------|
| 1.0   | 100  | 59   | 5.2   | 0    | 100  | 26.9  | 0    | 100  |
| 1.2   | 53   | 90   | 6.0   | 0    | 100  | 31.3  | 0    | 100  |
| 1.3   | 17   | 100  | 7.0   | 0    | 100  | 36.4  | 0    | 100  |
| 1.6   | 0    | 100  | 8.1   | 0    | 100  | 42.2  | 0    | 100  |
| 1.8   | 0    | 100  | 9.4   | 0    | 100  | 49.0  | 0    | 100  |
| 2.1   | 0    | 100  | 11.0  | 0    | 100  | 57.0  | 0    | 100  |
| 2.5   | 0    | 100  | 12.7  | 0    | 100  | 66.2  | 0    | 100  |
| 2.9   | 0    | 100  | 14.8  | 0    | 100  | 76.9  | 0    | 100  |
| 3.3   | 0    | 100  | 17.2  | 0    | 100  | 89.3  | 0    | 100  |
| 3.8   | 0    | 100  | 20.0  | 0    | 100  | 103.7 | 0    | 100  |
| 4.5   | 0    | 100  | 23.2  | 0    | 100  | 120.4 | 0    | 100  |



Brookhaven Instruments Corp.  
ZetaPals Particle Sizing Software Ver. 3.86

Date: Aug 4, 2017  
Time: 12:16:56  
Batch: 0

Sample ID **AgNPs-3W-cost-01-08-17-centr- (Combined)**

Operator ID **Luca**

Notes **04-08-2017**

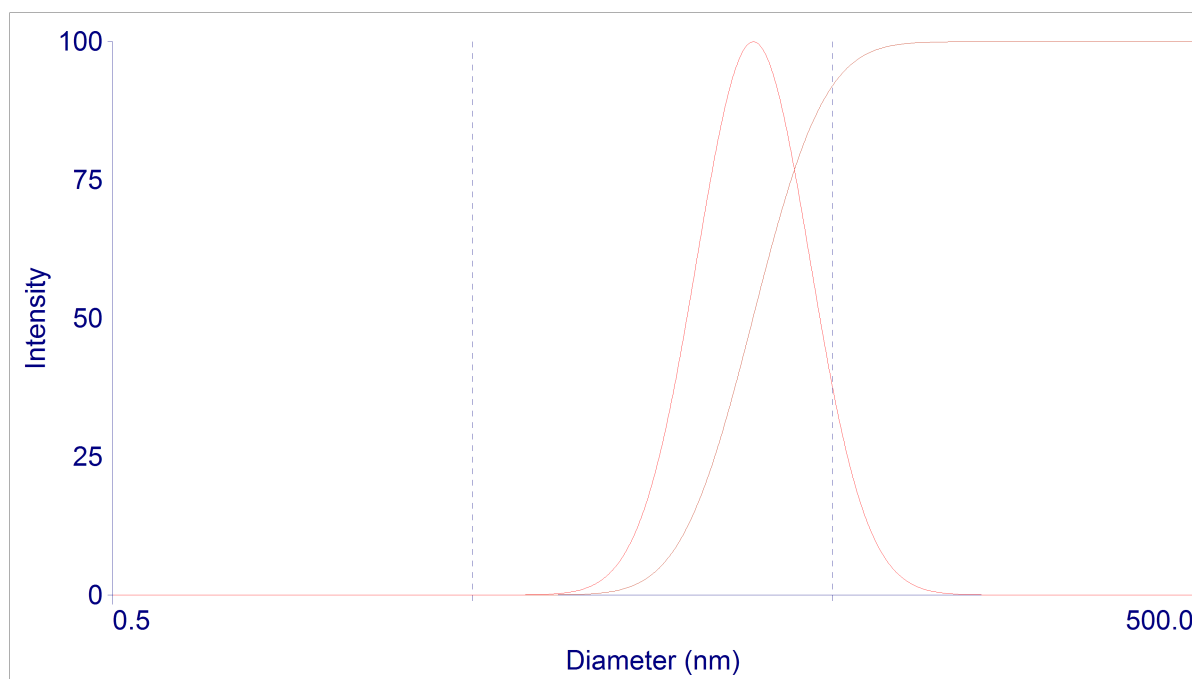

Lognormal Distribution

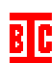

Brookhaven Instruments Corp.  
ZetaPals Particle Sizing Software Ver. 3.86

Date: Aug 4, 2017  
Time: 12:16:56  
Batch: 0

Sample ID **AgNPs-3W-cost-01-08-17-centr- (Combined)**

Operator ID **Luca**

Notes **04-08-2017**

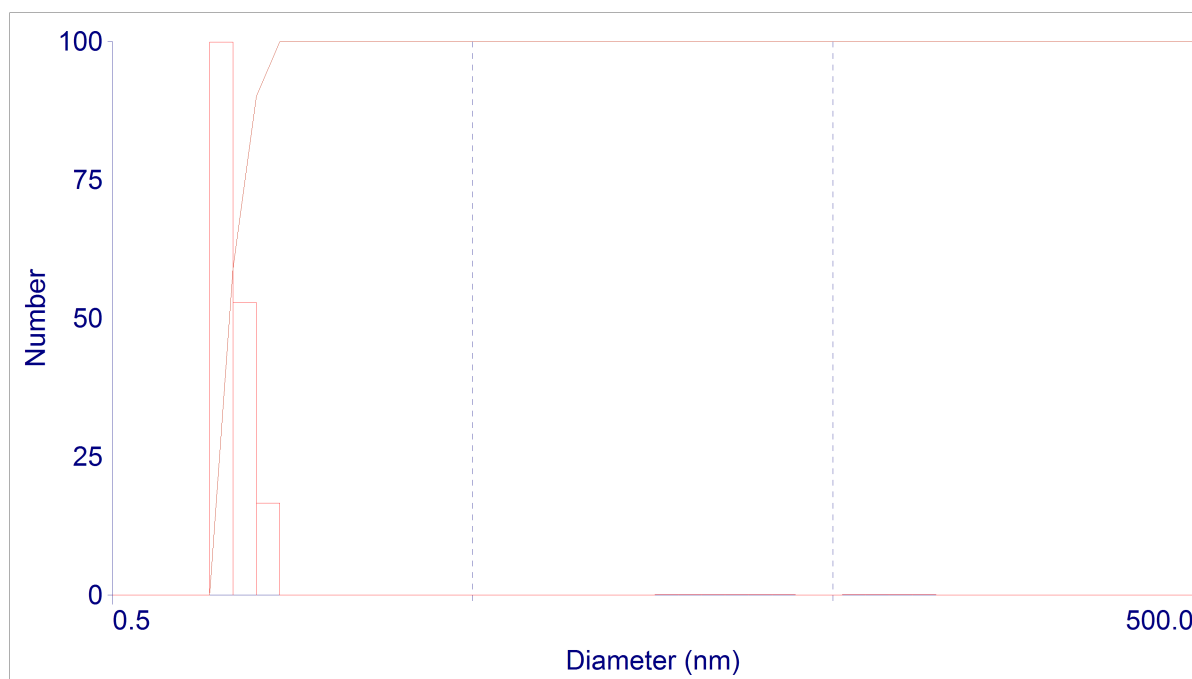

Multimodal Size Distribution
